# Supplementary material for: Uranium rejection with nanofiltration membranes and the influence of environmentally relevant mono- and divalent cations at various pH
Source: Royal Society of Chemistry journal article supplement (doi:10.1039/d4ew00324a), 2024-01-01
Supplement: d4ew00324a1.pdf [file d4ew00324a1.pdf]

## Supporting Information

Uranium rejection with nanofiltration membranes and the  
influence of environmentally relevant mono- and divalent cations  
at various pH

Submitted to

*Royal Society of Chemistry*

*Environmental Science: Water Research & Technology*

Christopher B. Yazzie<sup>a</sup>, Catalina Elias<sup>b</sup>, and Vasiliki Karanikola<sup>a,\*</sup>

<sup>a</sup>Chemical and Environmental Engineering Department, University of  
Arizona, Tucson, Arizona, 85721

<sup>b</sup>Biosystems Engineering Department, University of Arizona, Tucson,  
Arizona, 85721

**Number of Tables: 2**

**Number of Figures: 8**

**Number of Pages: 9**

\*Corresponding author: e-mail: vkaranik@arizona; Tel: +1 (520) 621-5881

## 20 Bench scale system

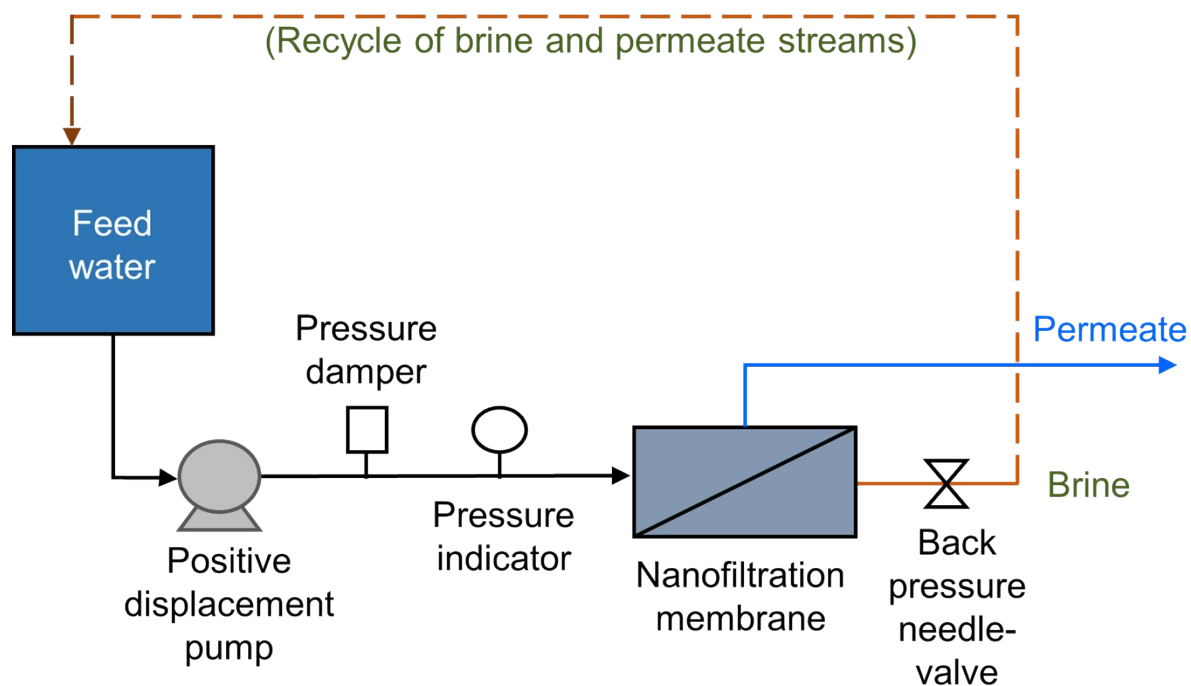

21  
22 **Figure S1:** Schematic of bench scale membrane system. During experimental  
23 operation, the brine and permeate stream is recycled back into the feed water tank. During  
24 sampling and taking permeate flux readings, the permeate stream is collected.

## 25 26 Uranium speciation modeling

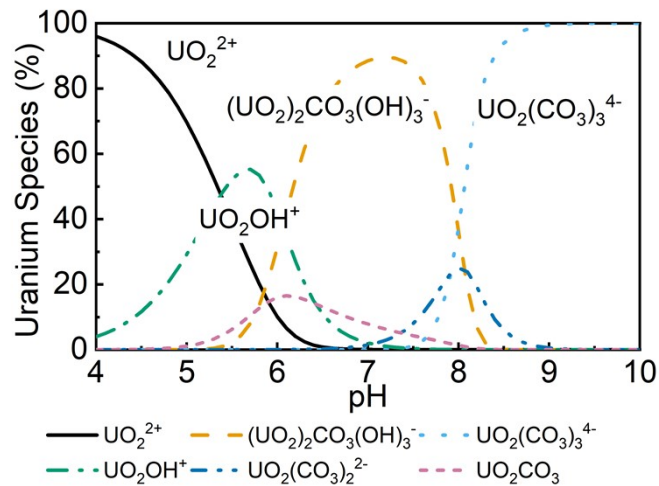

27

28 **Figure S2:** Uranium speciation modeling using Minteq 3.1. Computation input  $1\text{g}\cdot\text{L}^{-1}$   
 29 NaCl with carbonate simulated as open to the atmosphere ( $0.38 \cdot 10^{-3} \text{ atm CO}_2$ ), uranium  
 30 concentration was  $150 \mu\text{g}\cdot\text{L}^{-1}$ .

31

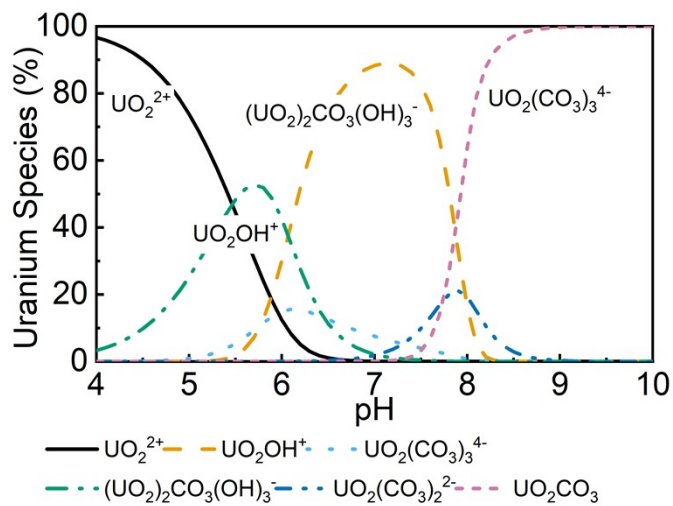

32

**Figure S3:** Uranium speciation modeling using Minteq 3.1. Computation input  $1\text{g}\cdot\text{L}^{-1}$   $\text{MgCl}_2$  with carbonate simulated as open to the atmosphere ( $0.38 \cdot 10^{-3}$  atm  $\text{CO}_2$ ), uranium concentration was  $150 \mu\text{g}\cdot\text{L}^{-1}$ .

*Determination of mass transfer coefficient for calculation of concentration polarization.*

The concentration polarization modulus (**Equation 1** in main text) was determined by first obtaining the mass transfer coefficient ( $k$ ) from the Sherwood number (**Equation S1**) based on turbulent flows in the following equation.

$$S_h = 0.04Re^{0.75}Sc^{0.33} \quad (\text{S1})$$

Where  $Re$  is the Reynolds number (6346.93),  $Sc$  is the Schmidt number (476.827). The Sherwood number is then used to calculate the mass transfer coefficient ( $k$ ) from the following equation.

$$k = \frac{S_h D}{d_h} \quad (\text{S2})$$

Where  $D$  is the diffusion coefficient ( $2.1 \cdot 10^{-9} \text{m}^2\cdot\text{s}^{-1}$ ),  $d_h$  is the hydraulic radius ( $3.91 \cdot 10^{-3} \text{m}$ ). Results of concentration polarization modulus (**Eq.3** in main text) are shown in **Table S1** and **S2**.

**Table S1:** Concentration polarization modulus for NF90 for each experimental condition across a range of pH.

| Solution                    | pH    |       |       |       |       |
|-----------------------------|-------|-------|-------|-------|-------|
|                             | 4     | 5.5   | 7     | 8.5   | 10    |
| U                           | 1.137 | 1.144 | 1.144 | 1.147 | 1.143 |
| U + 1 g/L NaCl              | 1.084 | 1.092 | 1.088 | 1.086 | 1.087 |
| U + 5 g/L NaCl              | 1.025 | 1.031 | 1.029 | 1.028 | 1.027 |
| U + 1 g/L MgCl <sub>2</sub> | 1.106 | 1.106 | 1.103 | 1.101 | 1.099 |
| U + 5 g/L MgCl <sub>2</sub> | 1.050 | 1.052 | 1.050 | 1.051 | 1.052 |
| U + 1 g/L CaSO <sub>4</sub> | 1.095 | 1.102 | 1.101 | 1.104 | 1.100 |

52

53 **Table S2:** Concentration polarization modulus for NF270 for each experimental  
54 condition across a range of pH.

| Solution                    | pH    |       |       |       |       |
|-----------------------------|-------|-------|-------|-------|-------|
|                             | 4     | 5.5   | 7     | 8.5   | 10    |
| U                           | 1.235 | 1.216 | 1.217 | 1.205 | 1.220 |
| U + 1 g/L NaCl              | 1.218 | 1.203 | 1.171 | 1.171 | 1.176 |
| U + 5 g/L NaCl              | 1.192 | 1.167 | 1.142 | 1.145 | 1.152 |
| U + 1 g/L MgCl <sub>2</sub> | 1.162 | 1.167 | 1.169 | 1.176 | 1.175 |
| U + 5 g/L MgCl <sub>2</sub> | 1.090 | 1.098 | 1.112 | 1.125 | 1.131 |
| U + 1 g/L CaSO <sub>4</sub> | 1.180 | 1.173 | 1.168 | 1.164 | 1.161 |

55

56

57 *Solute Flux*

58 Solute flux ( $J_s$ ) was calculated employing the following equation:

59 
$$j_s = C_{permeate} \cdot J_w \quad (S3)$$

60 Where  $C_{permeate}$  is the permeate feed concentration, and  $J_w$  is the water flux.

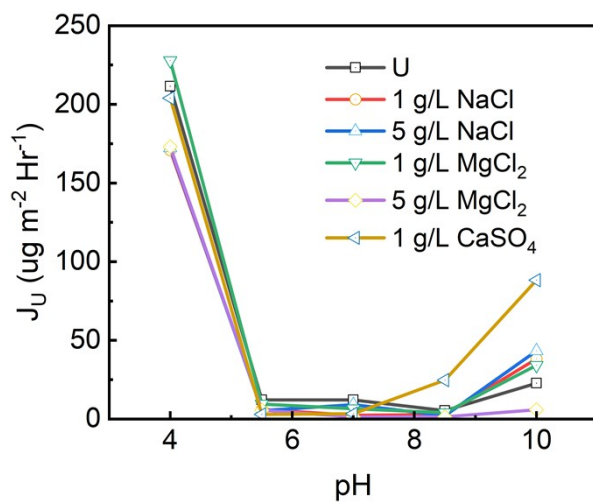

61

62 **Figure S4:** Influence of uranium-containing salt solutions on uranium flux for NF90  
63 membrane. Separate experiments were conducted for each salt solution. All solutions in  
64 these tests also contained  $150 \mu\text{g}\cdot\text{L}^{-1}$  of uranium, operated at  $22^\circ\text{C}$  and 75 psi.

65

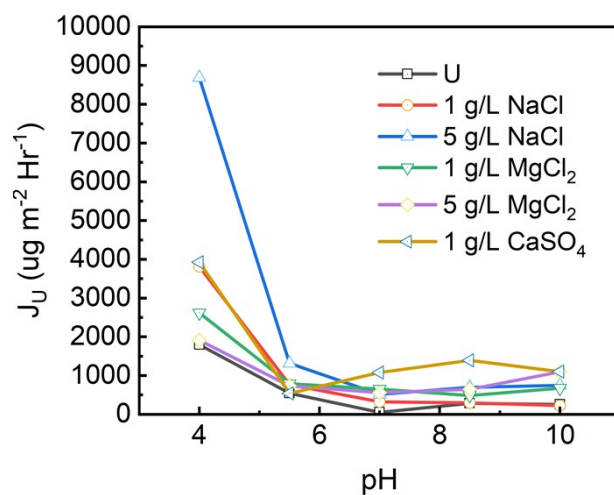

66

**Figure S5:** Influence of uranium-containing salt solutions on uranium flux for NF270 membrane. Separate experiments were conducted for each salt solution. All solutions in these tests also contained 150  $\mu\text{g}\cdot\text{L}^{-1}$  of uranium, operated at 22°C and 75 psi.

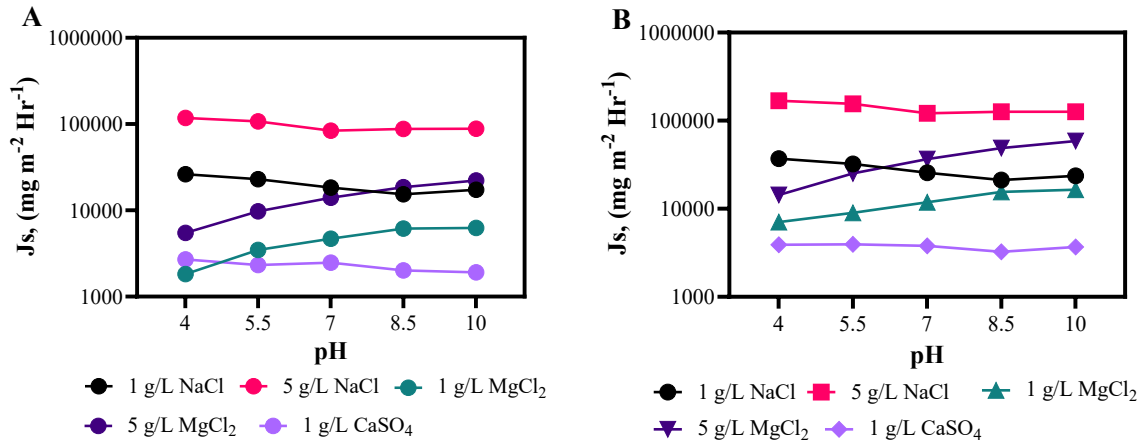

**Figure S6:** NF 270(A) Cation, (B) Anions. Influence of uranium-containing salt solutions on solute flux. Flux is calculated for Na<sup>+</sup> and Cl<sup>-</sup> in 1 g·L<sup>-1</sup> NaCl solution for NF90 membrane across a range of pH. All solutions in these tests also contained 150  $\mu\text{g}\cdot\text{L}^{-1}$  of uranium, operated at 22°C and 75 psi.

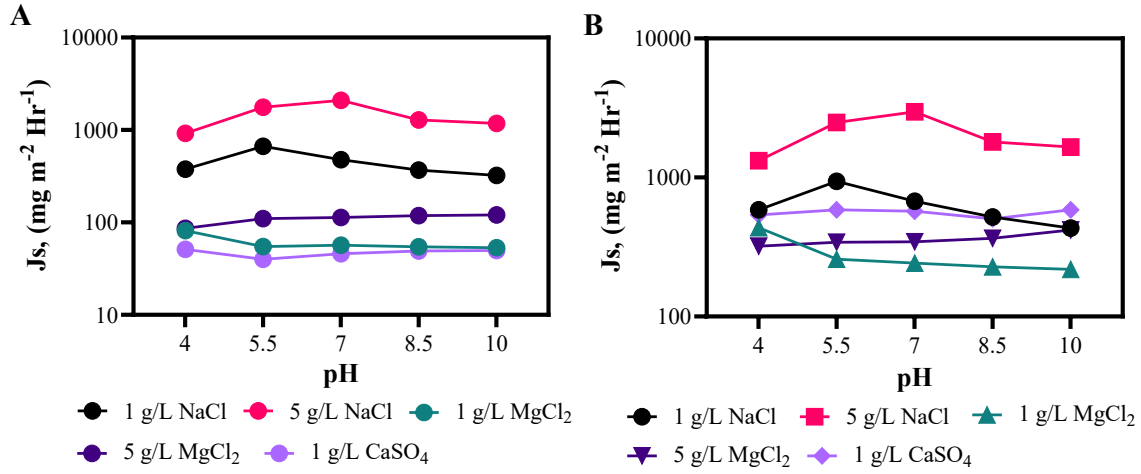

77

78 **Figure S7:** NF 90(A) Cation, (B) Anions. Influence of uranium-containing salt solutions  
 79 on solute flux. Flux is calculated for Na<sup>+</sup> and Cl<sup>-</sup> in 1 g·L<sup>-1</sup> NaCl solution for NF90  
 80 membrane across a range of pH. All solutions in these tests also contained 150 µg·L<sup>-1</sup>  
 81 of uranium, operated at 22°C and 75 psi.

82

### 83 *Water Flux Performance*

84 Water flux ( $J_w$ ) was calculated employing the following equation:

$$J_w = \frac{V}{t \cdot A} \quad (\text{S4})$$

86 Where  $V$  is the volume (L) of permeate water collected during time  $t$  (h<sup>1</sup>) and  $A$  is the  
 87 area (m<sup>2</sup>) of the membrane surface.

88 Water volumetric flux can also be stated as a function of solvent permeability constant  
 89 ( $A_w$ ), hydrostatic pressure ( $P$ ), and osmotic pressure ( $\pi$ ) through the following equation:

$$J_w = A_w(\Delta P - \Delta\pi) \quad (\text{S5})$$

90

91 Where  $\Delta P$  is the applied pressure difference between the feed solution and the permeate  
92 solution.  $\Delta\pi$  is the calculated osmotic pressure difference between the feed and the  
93 permeate streams.

$$94 \quad \pi = icRT \quad (S6)$$

95 Where  $i$  is the Van Hoff coefficient,  $R$  is the gas constant ( $8.314 \text{ kPa}\cdot\text{m}^3\cdot\text{mol}^{-1}\cdot\text{K}^{-1}$ ), and  $T$   
96 is the temperature ( $K$ ).

97

98 The addition of NaCl,  $\text{MgCl}_2$ , and  $\text{CaSO}_4$  were chosen as typical mineral solutes found in  
99 natural groundwater (Fortune et al. 2009). The NF90 (**Figure S8A**) exhibited water fluxes  
100 ranging between 8 – 45 ( $\text{L}\cdot\text{m}^{-2}\cdot\text{hr}^{-1}$ ) between pH 4 -10. The NF270 (**Figure S8B**) exhibited  
101 water fluxes between 35 – 97 ( $\text{L}\cdot\text{m}^{-2}\cdot\text{hr}^{-1}$ ) between the same pH 4 – 10. The pH variation  
102 resulted in marginal changes to water production (flux). Therefore, next we examined how  
103 the ionic strength of the solution affects water flux. The addition of ions had a negative  
104 effect on both membrane (NF90 and NF270) water production performances. This  
105 observation is expected as the osmotic pressure for each solution increases by the  
106 addition of ions. Osmotic pressures were calculated (**Equation S6**) for each solution and  
107 listed in decreasing osmotic pressure: 5  $\text{g}\cdot\text{L}^{-1}$  NaCl, 5  $\text{g}\cdot\text{L}^{-1}$   $\text{MgCl}_2$ , 1  $\text{g}\cdot\text{L}^{-1}$  NaCl, 1  $\text{g}\cdot\text{L}^{-1}$   
108  $\text{MgCl}_2$ , 1  $\text{g}\cdot\text{L}^{-1}$   $\text{CaSO}_4$ , U, DI. (30.5psi, 18.7psi, 6.1psi, 3.7psi, 2.6psi, 0.0psi). From the  
109 NF90 membrane experiments, water flux in increasing order for the experimental  
110 solutions are as follows: 5  $\text{g}\cdot\text{L}^{-1}$  NaCl, 5  $\text{g}\cdot\text{L}^{-1}$   $\text{MgCl}_2$ , 1  $\text{g}\cdot\text{L}^{-1}$  NaCl, 1  $\text{g}\cdot\text{L}^{-1}$   $\text{CaSO}_4$ , 1  $\text{g}\cdot\text{L}^{-1}$   
111  $\text{MgCl}_2$ , U, DI. The increasing order of water flux for NF 270 membrane experiments is as  
112 follows: 5  $\text{g}\cdot\text{L}^{-1}$   $\text{MgCl}_2$ , 5  $\text{g}\cdot\text{L}^{-1}$  NaCl, 1  $\text{g}\cdot\text{L}^{-1}$  NaCl ~ 1  $\text{g}\cdot\text{L}^{-1}$   $\text{CaSO}_4$  ~ 1  $\text{g}\cdot\text{L}^{-1}$   $\text{MgCl}_2$ , U, DI.

113 Our results showed a correlation between the reduction of water flux to an increase of  
 114 solute concentration in the feed solutions. The addition of solute ions increased the  
 115 solution osmotic pressure, followed by the reduction of water flux due to the need for  
 116 additional external pressure to exceed the osmotic pressure to generate water flux, which  
 117 correlates with **Equation S6**. Depending on the ionic concentration of groundwater, a  
 118 decrease in water production can be expected in areas with groundwater with high total  
 119 dissolved solids.

120

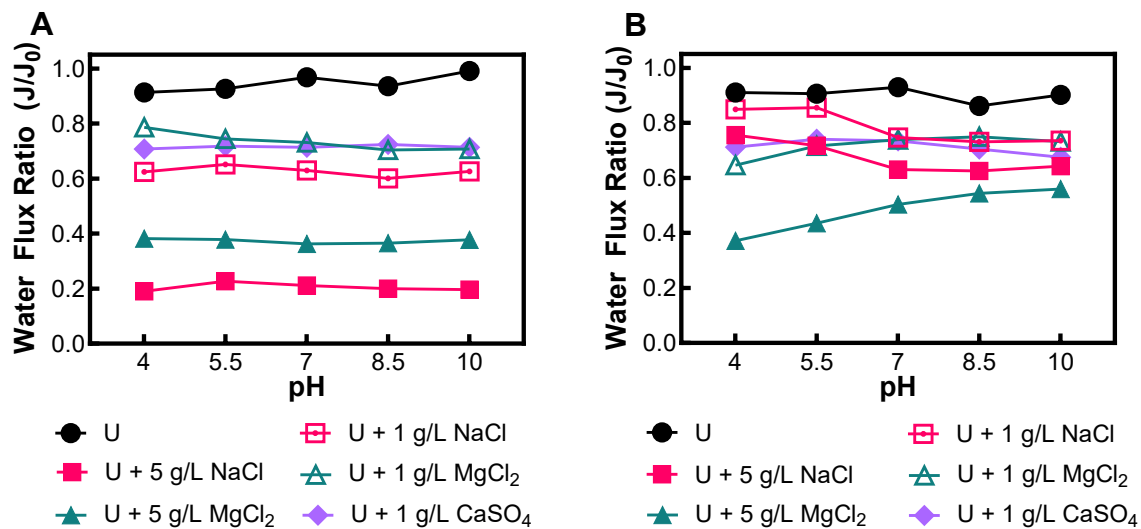

121

122 **Figure S8.** Influence of uranium-containing salt solutions on water permeate production  
 123 for A) NF90 and B) NF270. All solutions in these tests contained  $150 \mu\text{g}\cdot\text{L}^{-1}$  of uranium,  
 124 operated at  $22^\circ\text{C}$  and 75 psi.

125
